# Supplementary material for: Ethnobotanical Research of Plants Used in Traditional Medicine for The Treatment of Epilepsy in Southern Mozambique
Source: Research Square preprint supplement (doi:10.21203/rs.3.rs-840004/v1), 2021-08-31
Supplement: Supplementary file 1 [file 1f3670214d7a89c82c19e9cc.docx]

Table 2: Plants used in traditional medicine for the treatment of epilepsy in southern Mozambique, voucher number, form of growth, date of collection and place of collection

| **Cientific name** | | **Vernacular name** | **Family** | **Voucher number** | **Growth form** | **Date of colletion** | **Place of colletion** |
| --- | --- | --- | --- | --- | --- | --- | --- |
| *Terminalia sericea* Bruch. ex DC. | Konola | | Combretaceae | AB158 | Tree | 16/4/2019 | Mabalane |
| *Strychnos decussata* (Pappe) Gild | Tambaculota | | Loganiaceae | AB159 | Tree | 16/4/2019 | Mabalane |
| *Uvaria caffra* E. Mey. ex Sond. | Tsovatsova | | Annonaceae | AB160 | Shrub | 16/4/2019 | Mabalane |
| *Cyphostemma congestum*  (Baker) Desc. ex Wild & R.B.Drumm. | | Nhamuntana | Vitaceae | AB161 | Climber | 16/4/2019 | Mabalane |
| *Hugonia orientalis* Engl. | | kongolotamunte | Linaceae | AB162 | Shrub | 16/4/2019 | Mabalane |
| *Xeroderris stuhlmannii* (Taub.) Mendonça e Sousa | Ndzungua | | Fabaceae | AB163 | Tree | 16/4/2019 | Mabalane |
| *Catunaregam spinosa* (Thunb.) Tirveng. | | Xibamarole, Xiba marok | Rubiaceae | AB164 | Shrub | 16/4/2019 | Mabalane |
| *Ipomoea obscura* (L.) Ker Gawl. | | Sungucate | Convulvulaceae | AB165 | Herb | 16/4/2019 | Mabalane |
| *Uvaria lucida* (N.E.Br.) Verdc. | Muvava | | Annonaceae | AB166 | Shrub | 26/4/2019 | Funhalouro |
| *Rhoicissus revoilii* Planch. | Nlalhapwane | | Vitaceae | AB167 | Shrub | 26/4/2019 | Funhalouro |
| *Manilkara mochisia* (Bark.) Dubard | Nwambo, Muhambo | | Sapotaceae | AB168 | Tree | 26/4/2019 | Funhalouro |
| *Albertisia delagoensis* (N.E.Br) Forman | | Kodhodho, Cododo | Menispermaceae | AB169 | Shrub | 26/4/2019 | Funhalouro |
| *Maclura africana* (Bureau) Corner | Mpumbolo | | Moraceae | AB170 | Shrub | 26/4/2019 | Funhalouro |
| *Holarrhena pubescens* Wall. Ex G.Don | | Chiritse | Apocynaceae | AB171 | Shurb | 26/4/2019 | Funhalouro |
| *Strychnos spinosa* Lam. | Nsala | | Loganiaceae | AB173 | Tree | 16/4/2019 | Mabalane |
| *Artabotrys brachypetalus* Benth | | Ntita | Annonaceae | AB174 | Shrub | 16/4 /2019and 29/4/2019 | Mabalane and Inharrime |
| *Strychnos madagascariensis* Poir. | Macuacua | | Loganiaceae | AB175 | Tree | 16/4/2019 | Mabalane |
| *Vangueria infausta* Burch. | Pfilwa | | Rubiaceae | AB176 | Shrub | 2/5/2019 | Xai-xai |
| *Gymnanthemum coloratum* (Willd.) H.Rob. & B.Kahn | | Phalha Kufa | Asteraceae | AB177 | Shrub | 2/5/2019 | Xai-xai |
| *Cladostemon kirkii* (Oliv.) Pax & Gilg. | | Mawocane | Caparraceae | AB178 | Tree | 2/5/2019 | Xai-xai |
| *Grewia caffra* Meisn. | | Nhocana ukulo | Malvaceae | AB179 | Shrub | 16/4/2019 | Mabalane |
| *Tiliacora funifera* (Miers) Oliv. | Xiwizila | | Menispermaceae | AB180 | Climber | 16/4/2019 | Mabalane |
| *Ansellia africana* Lindl. | | Ngonhama | Orchidaceae | AB181 | Herb | 16/4/2019 | Mabalane |
| *Cocculus hirsutus* (L.) W.Theob. | | Mulha nhoca | Menispermaceae | AB182 | Climber | 16/4/2019 | Mabalane |
| *Annona senegalensis* Pers. | | Rofwa wa kulafi | Annonaceae | AB183 | Shrub | 16/4/2019 | Mabalane |
| *Cissampelos mucronata* A. Rich. | | Nhocanhocane | Menispermaceae | AB184 | Climber | 26/4/2019 | Funhalouro |
| *Cucumis metuliferus* E.Mey. ex Naudin | | Dema | Curcubitaceae | AB185 | Climber | 16/4/2019 | Mabalane |
| *Garcinia livingstonei* T. Anderson. | | Mahimbe | Clusiaceae | AB186 | Tree | 26/4/2019 | Funhalouro |
| *Helichrysum kraussii* Sch.-Bip | | Chiringuate | Asteraceae | AB187 | Shrub | 16/4/2019 | Mabalane |
| *Huernia kirkii* N.E. Br. | | Lhakuzi | Apocynaceae | AB188 | Herb | 16/4/2019 | Mabalane |
| *Senna occidentalis* (L.) Link | Nhocana utsongo | | Fabaceae | AB189 | Shrub | 16/4/2019 | Mabalane |
| *Senna petersiana* (Bolle) Lock | Nembenembe, Nhadzente | | Fabaceae | AB190 | Shrub | 16/4/2019 and 29/4/2019 | Mabalane and Inharrime |

- Not number
